# Supplementary material for: CO2-assisted hydrolytic hydrogenation of cellulose and cellulose-based waste into sorbitol over commercial Ru/C
Source: Royal Society of Chemistry journal article supplement (doi:10.1039/d3gc01813j), 2023-01-01
Supplement: d3gc01813j1.pdf [file d3gc01813j1.pdf]

## SUPPORTING INFORMATION

### CO<sub>2</sub>-assisted Hydrolytic Hydrogenation of Cellulose and Cellulose-based Waste into Sorbitol over Commercial Ru/C

Daniele Polidoro,<sup>a</sup> Giancarmelo Stamilla,<sup>a</sup> Matteo Feltracco,<sup>b,c</sup> Andrea Gambaro,<sup>b,c</sup> Alvisè Perosa,<sup>a</sup> Maurizio Selva <sup>\*a</sup>

<sup>a</sup> Department of Molecular Science and Nanosystems, Ca' Foscari University of Venice, Via Torino 155, 30175 – Venezia Mestre, Italy

<sup>b</sup> Institute of Polar Sciences-CNR, Via Torino 155, 30175 – Venezia Mestre, Italy

<sup>c</sup> Department of Environmental Sciences, Informatics and Statistics, Ca' Foscari University of Venice, Via Torino 155, 30175 – Venezia Mestre, Italy

#### **Product analysis**

The quantitative products analysis in the liquid phase was determined according to the following procedure. Each sample of the aqueous solution collected at the end of CO<sub>2</sub>-assisted hydrogenation tests was 1:100 diluted with ultrapure water (Elga Purelab Ultra System, High-Wycombe, UK), and a labeled <sup>13</sup>C6-levoglucosan was used as an internal standard, spiked with a final concentration of 1 mg L<sup>-1</sup>. Determination and quantification of all compounds were performed using an ion chromatograph (Thermo Scientific Dionex ICS-5000) coupled to a single quadrupole mass spectrometer (Thermo Scientific MSQ Plus). The chromatographic method was carried out using two separated methods: (a) seven saccharides (arabinose, fructose, galactose, glucose, mannose, ribose, xylose, and sucrose) and two alcohol-sugars (erythritol and maltitol) were separated using a CarboPac PA10 column (Thermo Scientific, 2 mm × 250 mm) equipped with a CarboPac PA10 guard column (2 × 50 mm). The sodium hydroxide gradient, generated by an eluent generator (Thermo Scientific, Dionex ICS 5000EG), was as follows: 0–3 min, 1 mM; 3–20 min gradient from 10 to 20 mM; 20–45 min isocratic elution with 20 mM; 45–55 min, column cleaning with 100 mM; 55– 60 min, equilibration at 1 mM. (b) The separation of the alcoholsugars (mannitol, ribitol, sorbitol, xylitol, and galactitol) was performed using a CarboPac MA1 analytical column (Thermo Scientific, 2 mm × 250 mm) equipped with an AminoTrap column (2 × 50 mm). The sodium hydroxide gradient was as follows: 20 mM (0–23 min), 100 mM (23–43 min), and 20 mM (43–53 min). The injection volume for both methods was 50 µL, and the flow rate was 0.25 mL min<sup>-1</sup>. Sodium hydroxide was removed using a suppressor (Thermo Scientific ASRS 500, 2 mm) before entering the mass spectrometer. To improve the ionization of the sugars in the aqueous eluent, a solution of

methanol/ammonia (7%) was added postcolumn with a flow of 0.025 mL min<sup>-1</sup>. The MS was operated with an electrospray ionization (ESI) interface in negative mode with a temperature of 400 °C and a needle voltage of -2500 V. Selected ion monitoring was used for detection.
